# Supplementary material for: Ditch-structured microporous layers fabricated by nanosecond-pulse laser ablation for enhancing water transport in polymer electrolyte membrane fuel cells
Source: Royal Society of Chemistry journal article supplement (doi:10.1039/d0ma00150c), 2020-01-01
Supplement: d0ma00150c1.pdf [file d0ma00150c1.pdf]

Electronic supplementary information (ESI) for *Materials Advances*

## Electronic Supplementary Information

### Ditch-structured microporous layers fabricated by nanosecond-pulse laser ablation for enhancing water transport in polymer electrolyte membrane fuel cells

*Dong-Hyun Lee, Min Kyung Kim, Hwanuk Guim, Seongmin Yuk, Jaeho Choi, Sungyu Choi, Gisu Doo, Dong Wook Lee, Jonghyun Hyun, Jiwhan Noh\* and Hee-Tak Kim\**

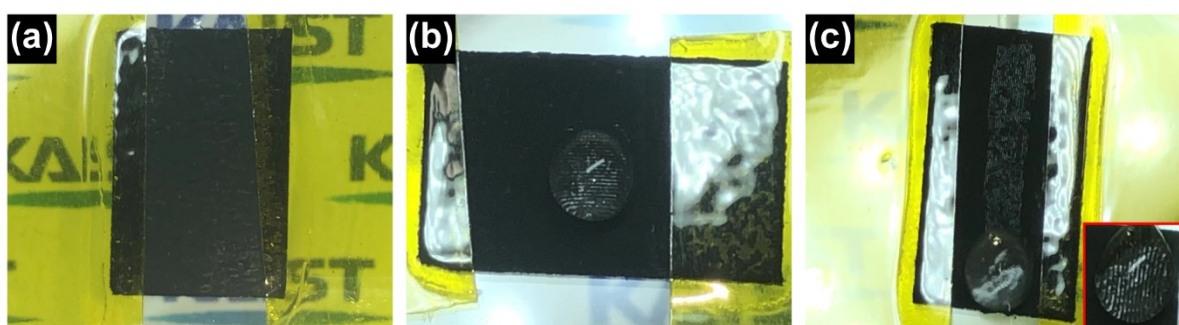

**Fig. S1** Capture images from the Movie. S1 representing the sliding of a water droplet on a 60° tilted (a) P-MPL and (b-c) D1-MPL with a ditch orientation (b) perpendicular and (c) parallel to the direction of gravity.

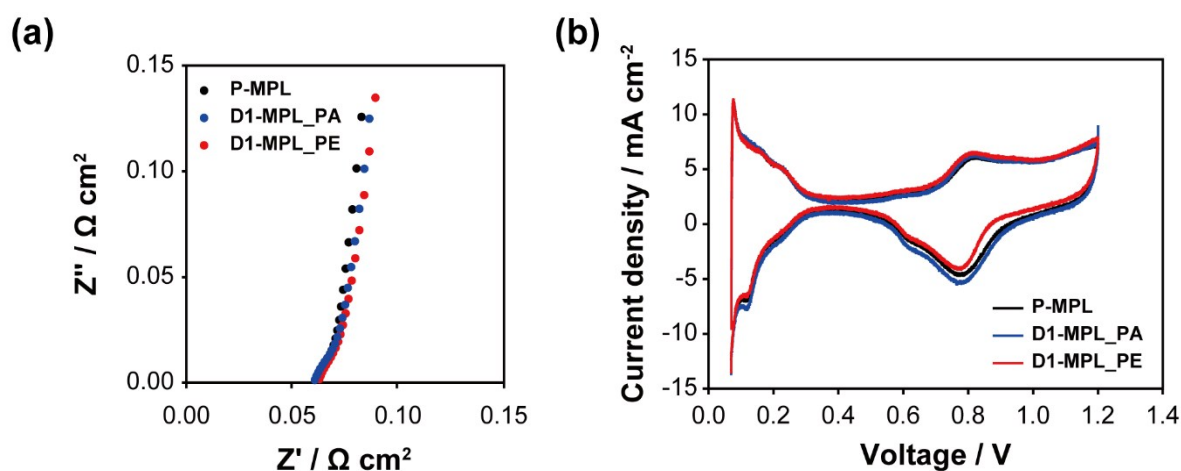

**Fig. S2** Electrochemical properties of the catalyst layers for various laser ablation conditions. (a) OCV impedance graph and (b) CV graph.

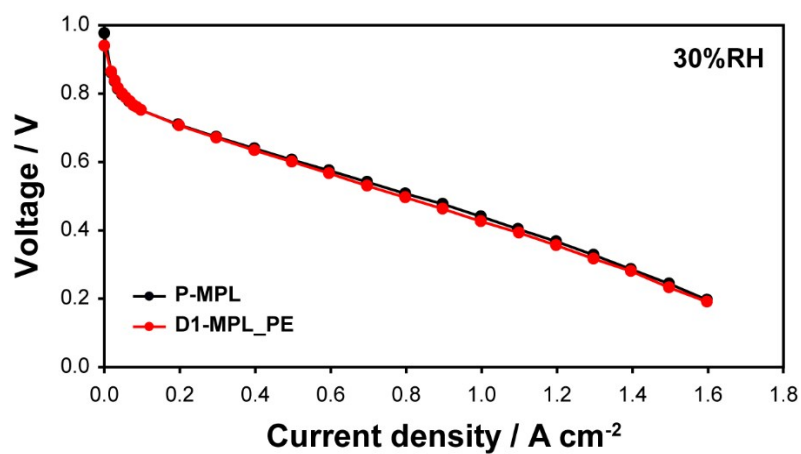

**Fig. S3** The i-V polarization curves of the P-MPL and D1-MPL\_PE in a low humidity condition.

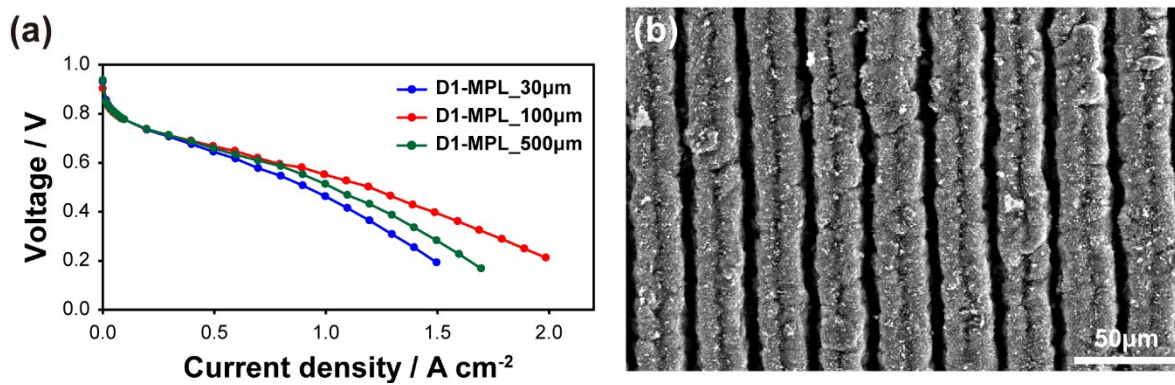

**Fig. S4** (a) Polarization curves with different ditch spacings for the D1-MPLs and (b) top-view SEM image of the D1-MPL\_30µm
